# Supplementary material for: SARS-CoV-2-specific T cell memory is sustained in COVID-19 convalescent patients for 10 months with successful development of stem cell-like memory T cells
Source: Springer Nature journal article supplement (doi:10.1038/s41467-021-24377-1), 2021-06-30
Supplement: 41467_2021_24377_MOESM1_ESM.pdf [file 41467_2021_24377_MOESM1_ESM.pdf]

**SARS-CoV-2-specific T Cell Memory is Sustained in COVID-19  
Convalescent Patients for 10 Months with Successful Development of  
Stem Cell-like Memory T Cells**

Jae Hyung Jung<sup>†</sup>, Min-Seok Rha<sup>†</sup>, Moa Sa, Hee Kyoung Choi, Ji Hoon Jeon, Hyeri Seok, Dae Won Park,  
Su-Hyung Park, Hye Won Jeong\*, Won Suk Choi\*, Eui-Cheol Shin\*

Supplementary Information

# Supplementary Figure 1

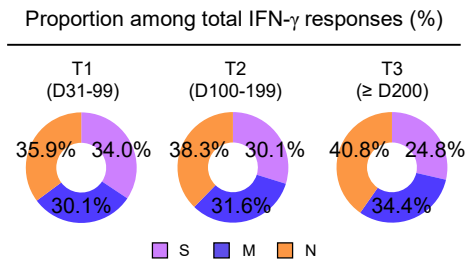

**Supplementary Figure 1. Proportion of S-, M-, and N-specific IFN- $\gamma$  responses among total IFN- $\gamma$  responses.** PBMC samples from COVID-19 convalescent patients were stimulated with OLPs of S, M, or N (1  $\mu$ g/mL) for 24 h and spot-forming units of IFN- $\gamma$ -secreting cells were examined by ELISpot. Pie charts showing the proportion of S-, M-, and N-specific IFN- $\gamma$  responses among the total IFN- $\gamma$  responses in T1 (n=49, 31 - 99 DPSO), T2 (n=41, 100 - 199 DPSO), and T3 (n=31,  $\geq$  200 DPSO).

## Supplementary Figure 2

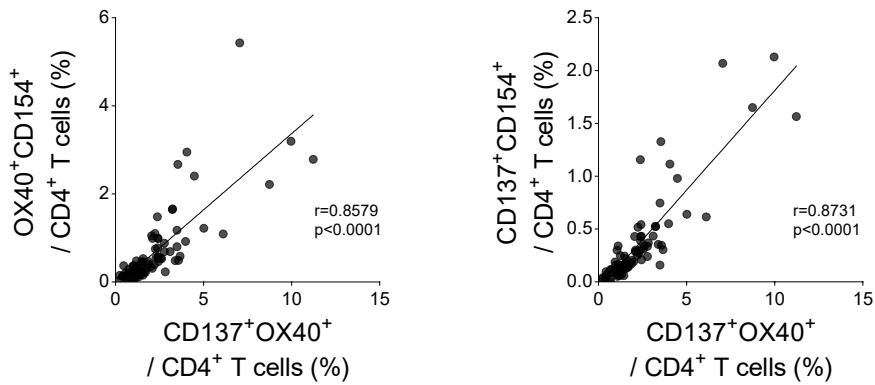

**Supplementary Figure 2. Correlation between the frequency of CD137<sup>+</sup>OX40<sup>+</sup> cells and the frequencies of alternative AIM<sup>+</sup> cells (OX40<sup>+</sup>CD154<sup>+</sup> or CD137<sup>+</sup>CD154<sup>+</sup> cells) among CD4<sup>+</sup> T cells.** PBMC samples from individuals with SARS-CoV-2 infection were stimulated with OLPs of S, M, or N (1  $\mu$ g/mL) for 24 hours, and the correlation between the frequency of CD137<sup>+</sup>OX40<sup>+</sup> cells and the frequencies of alternative AIM<sup>+</sup> cells (OX40<sup>+</sup>CD154<sup>+</sup> or CD137<sup>+</sup>CD154<sup>+</sup> cells) among CD4<sup>+</sup> T cells was analyzed (n=78). Statistical analysis was performed using the two-sided Spearman correlation test.

# Supplementary Figure 3

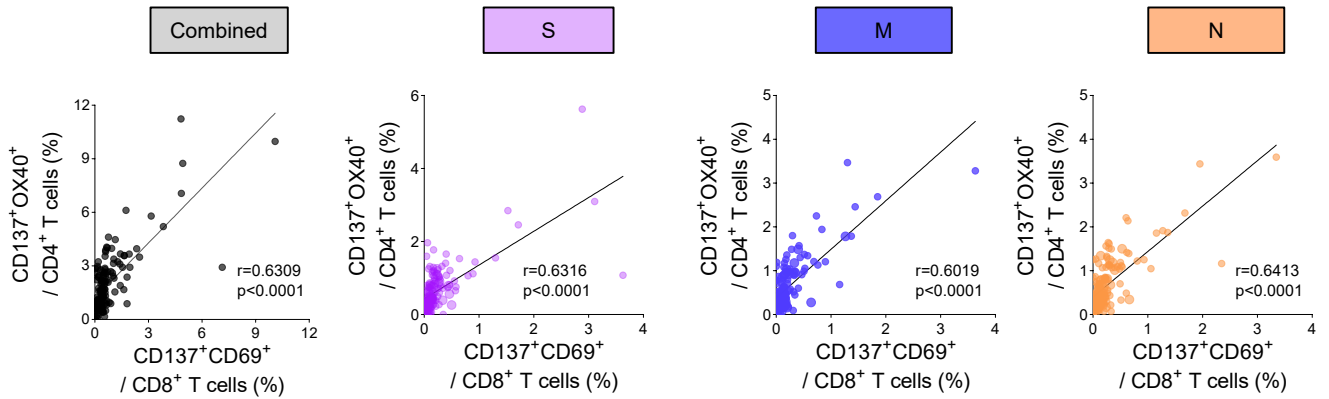

**Supplementary Figure 3. Correlation of the frequency of AIM<sup>+</sup> cells between CD4<sup>+</sup> and CD8<sup>+</sup> T cells.** PBMC samples from individuals with SARS-CoV-2 infection were stimulated with OLPs of S, M, or N (1  $\mu$ g/mL) for 24 h and the correlation between the frequency of AIM<sup>+</sup> (CD137<sup>+</sup>OX40<sup>+</sup>) cells among CD4<sup>+</sup> T cells and AIM<sup>+</sup> (CD137<sup>+</sup>CD69<sup>+</sup>) cells among CD8<sup>+</sup> T cells was analyzed (n=146). Statistical analysis was performed using the two-sided Spearman correlation test.

# Supplementary Figure 4

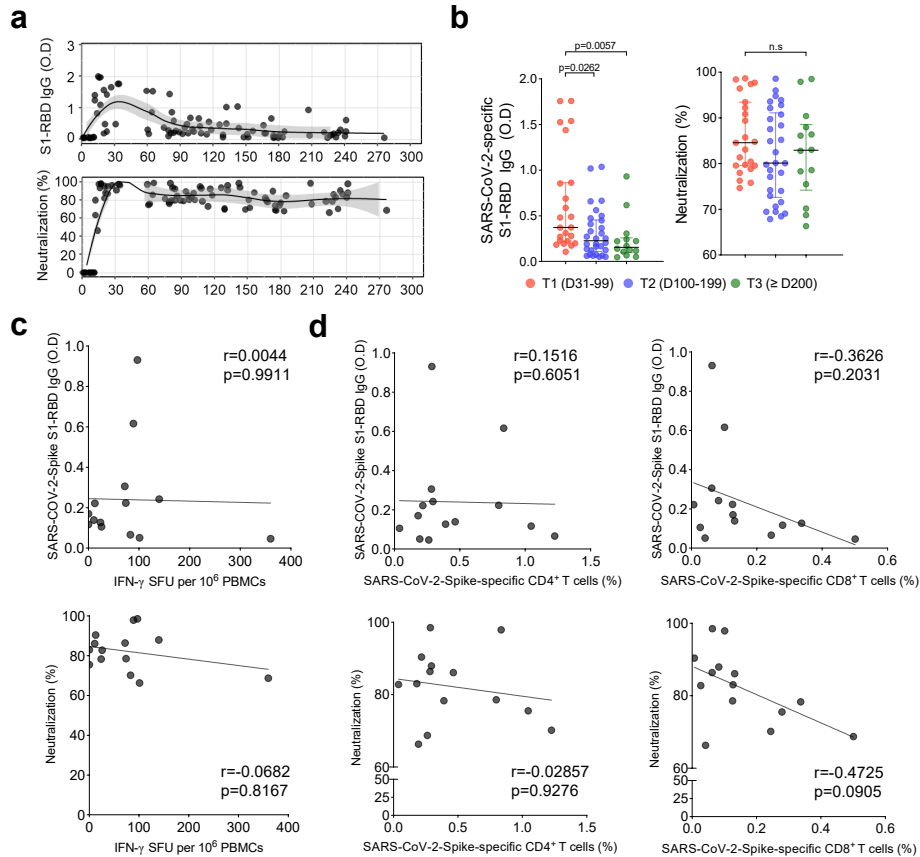

**Supplementary Figure 4. Kinetics of anti-SARS-CoV-2 antibodies up to 10 months post-infection.** The levels of SARS-CoV-2 S receptor binding domain (RBD)-specific IgG antibodies and SARS-CoV-2 neutralizing activity were measured in plasma samples from individuals with SARS-CoV-2 infection (n=91). **a**, Scatter plots showing the relationship between DPSO and the relative level of RBD IgG antibodies (upper) or neutralizing activity measured by SARS-CoV-2 surrogate virus neutralization assays (lower). The black line is a LOESS smooth nonparametric function, and the grey shading represents the 95% confidence interval. **b**, RBD IgG antibody levels and neutralizing activity were compared among T1 (n=23, 31 - 99 DPSO), T2 (n=30, 100 - 199 DPSO), and T3 (n=14,  $\geq$  200 DPSO). Data are presented as median and IQR. **c,d**, Correlation of RBD IgG antibodies and neutralizing activity with IFN- $\gamma$  spot numbers (n=14) (**c**) and SARS-CoV-2 S-specific AIM<sup>+</sup>CD4<sup>+</sup> and AIM<sup>+</sup>CD8<sup>+</sup> T cells (n=14) (**d**). Statistical analyses were performed using the two-sided Kruskal-Wallis test with two-sided Dunns' multiple comparisons test (**b**) or two-sided Spearman correlation test (**c,d**). n.s., not significant.

# Supplementary Figure 5

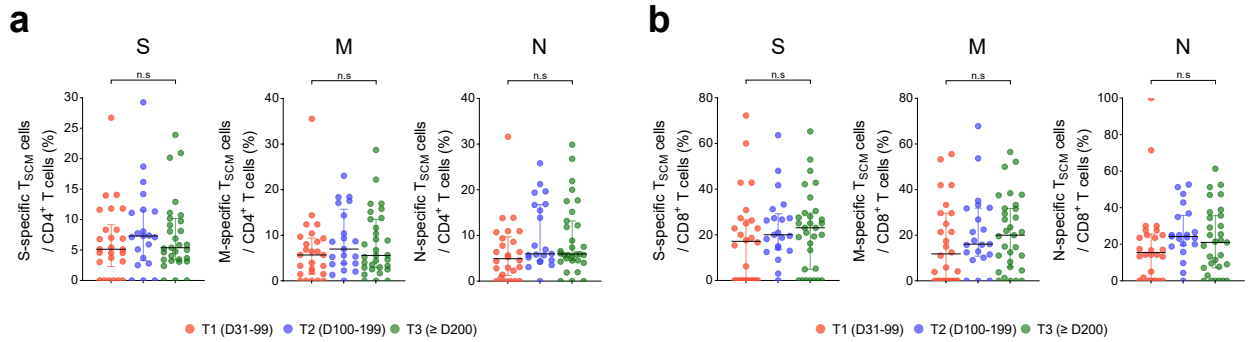

**Supplementary Figure 5. Frequency of T<sub>SCM</sub> cells among SARS-CoV-2-specific T cells according to days post-symptom onset.** **a,b**, PBMC samples from COVID-19 convalescent patients were stimulated with OLPs of S, M, or N (1 µg/mL) for 24 h and the frequency of T<sub>SCM</sub> (CCR7<sup>+</sup>CD45RA<sup>+</sup>CD95<sup>+</sup>) cells was analyzed among AIM<sup>+</sup> (CD137<sup>+</sup>OX40<sup>+</sup>) CD4<sup>+</sup> (**a**) and AIM<sup>+</sup> (CD137<sup>+</sup>CD69<sup>+</sup>) CD8<sup>+</sup> T cells (**b**). The frequencies of T<sub>SCM</sub> cells were compared between T1 (n=26, 31 - 99 DPSO), T2 (n=21, 100 - 199 DPSO), and T3 (n=31, ≥ 200 DPSO). Data are presented as median and IQR. Statistical analysis was performed using the two-sided Kruskal-Wallis test with Dunns' multiple comparisons test. n.s., not significant.

# Supplementary Figure 6

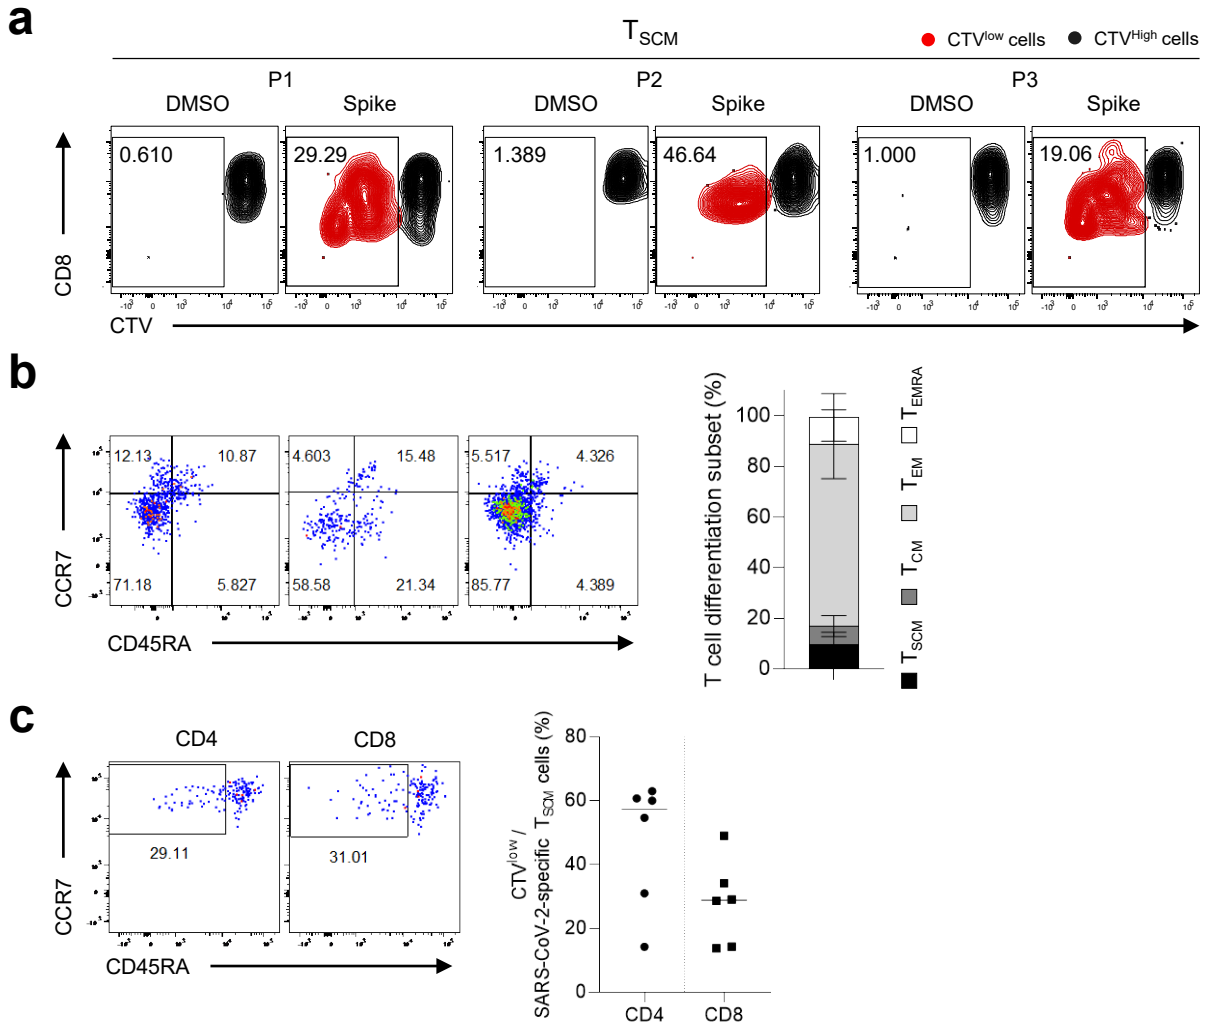

**Supplementary Figure 6. Proliferation, multipotency, and self-renewal capacity of SARS-CoV-2-spike-specific  $T_{SCM}$  T cells.** **a**, The proliferation capacity of SARS-CoV-2-specific  $T_{SCM}$  cells. Flow cytometry plots showing the proliferation of SARS-CoV-2-specific  $CD8^+$   $T_{SCM}$  cells from COVID-19 convalescent patients ( $n=3$ ) following stimulation with the S OLP pool (1  $\mu$ g/mL) for 7 days. **b**, Multipotency of SARS-CoV-2-specific  $T_{SCM}$  cells ( $n=3$ ). Flow cytometry plot (left) and summary graph (right) showing the composition of memory subsets among the progeny of SARS-CoV-2-specific  $CD8^+$   $T_{SCM}$  cells following stimulation with the S OLP pool for 7 days. Data are presented as mean values  $\pm$  SD. **c**, The self-renewal capacity of SARS-CoV-2-specific  $T_{SCM}$  cells. Flow cytometry plot (left) and summary graph (right) showing the proliferation of SARS-CoV-2-specific  $CD4^+$  and  $CD8^+$   $T_{SCM}$  cells in response to IL-15 treatment (25 ng/mL) for 5 days. Following culture with IL-15, the AIM assay was performed to detect SARS-CoV-2-specific  $T_{SCM}$  cells.

# Supplementary Figure 7

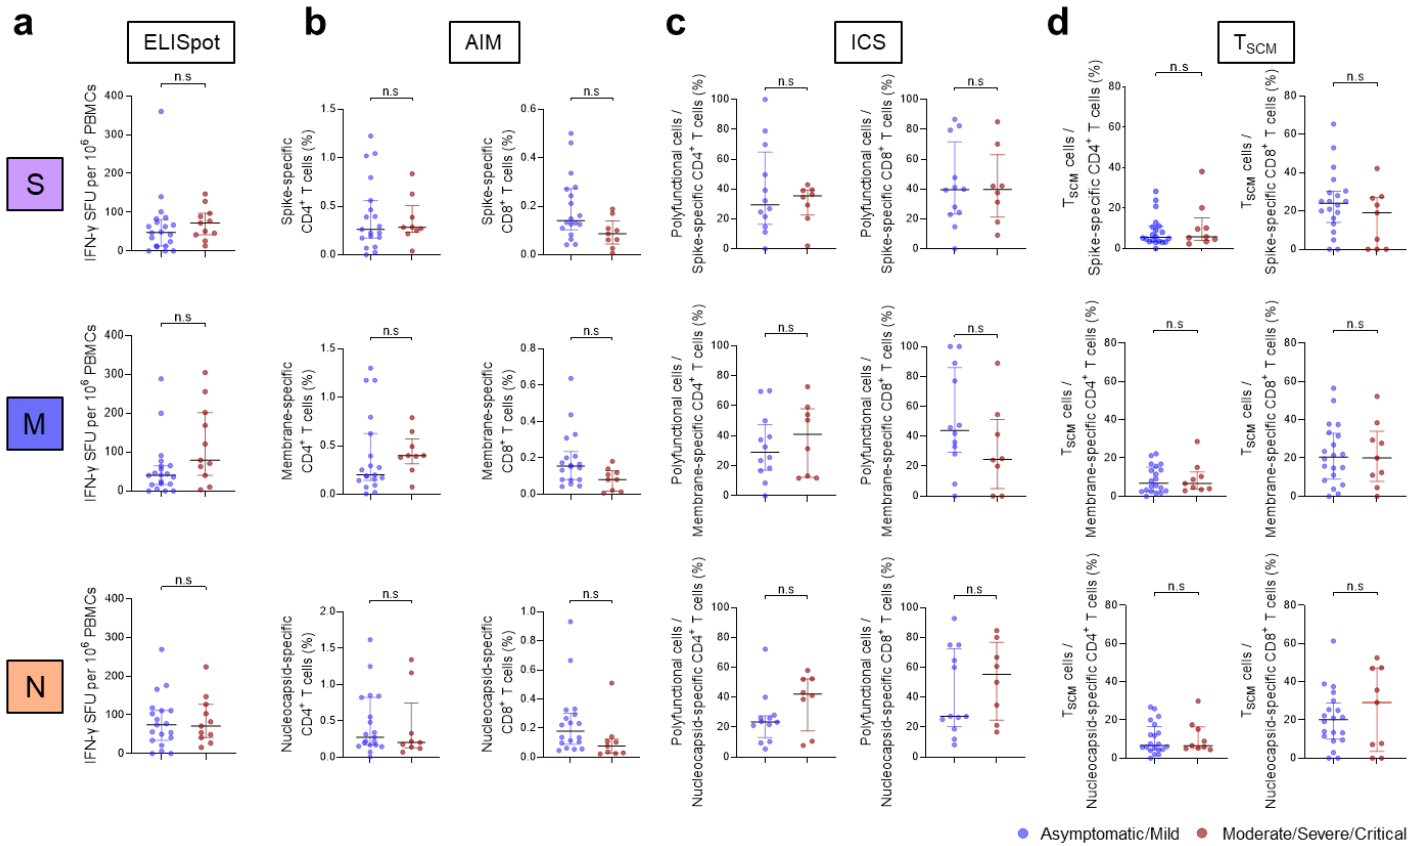

**Supplementary Figure 7. Comparison of long-term SARS-CoV-2-specific T-cell responses according to peak disease severity.** **a-d**, Long-term ( $\geq 200$  DPSO) SARS-CoV-2-specific T-cell responses were compared between the asymptomatic/mild group (blue) and the moderate/severe/critical group (red). **a-c**, Summary graphs showing **(a)** the spot-forming units of IFN- $\gamma$ -secreting cells (asymptomatic/mild group, n=20; moderate/severe/critical group, n=11), **(b)** the frequency of AIM<sup>+</sup> CD4<sup>+</sup> or CD8<sup>+</sup> T cells (asymptomatic/mild group, n=19; moderate/severe/critical group, n=10), and **(c)** the frequency of polyfunctional cells exhibiting positivity for  $\geq 2$  effector functions among SARS-CoV-2-specific CD4<sup>+</sup> and CD8<sup>+</sup> T cells (asymptomatic/mild group, n=12; moderate/severe/critical group, n=8). **d**, Summary graphs showing the frequency of T<sub>SCM</sub> (CCR7<sup>+</sup>CD45RA<sup>+</sup>CD95<sup>+</sup>) cells among AIM<sup>+</sup>CD4<sup>+</sup> or AIM<sup>+</sup>CD8<sup>+</sup> T cells (asymptomatic/mild group, n=19; moderate/severe/critical group, n=9). Data are presented as median and interquartile range (IQR). Statistical analyses were performed using the two-sided unpaired Mann-Whitney U test. n.s., not significant.



# Supplementary Figure 8

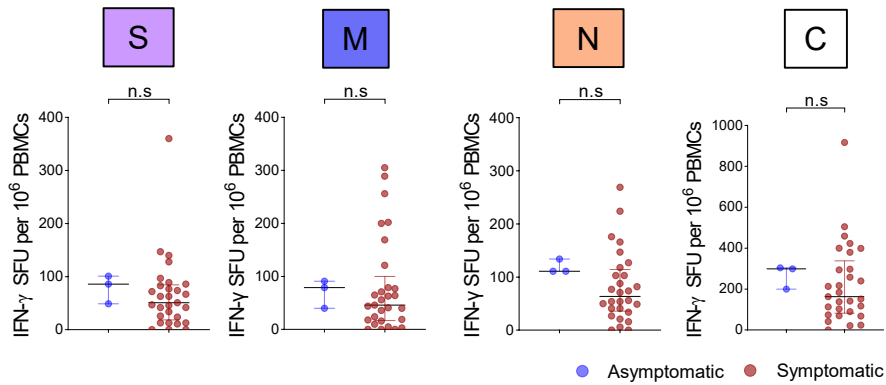

**Supplementary Fig. 8. Comparison of long-term SARS-CoV-2-specific IFN- $\gamma$  responses between the asymptomatic and symptomatic groups.** The results of IFN- $\gamma$  ELISpot assays of PBMCs from long-term COVID-19 convalescent patient samples ( $\geq 200$  DPSO) were compared between the asymptomatic group (blue;  $n=3$ ) and symptomatic group (red;  $n=29$ ). Data are presented as median and IQR. Statistical analyses were performed using the two-sided unpaired Mann-Whitney U test. n.s., not significant.

# Supplementary Figure 9

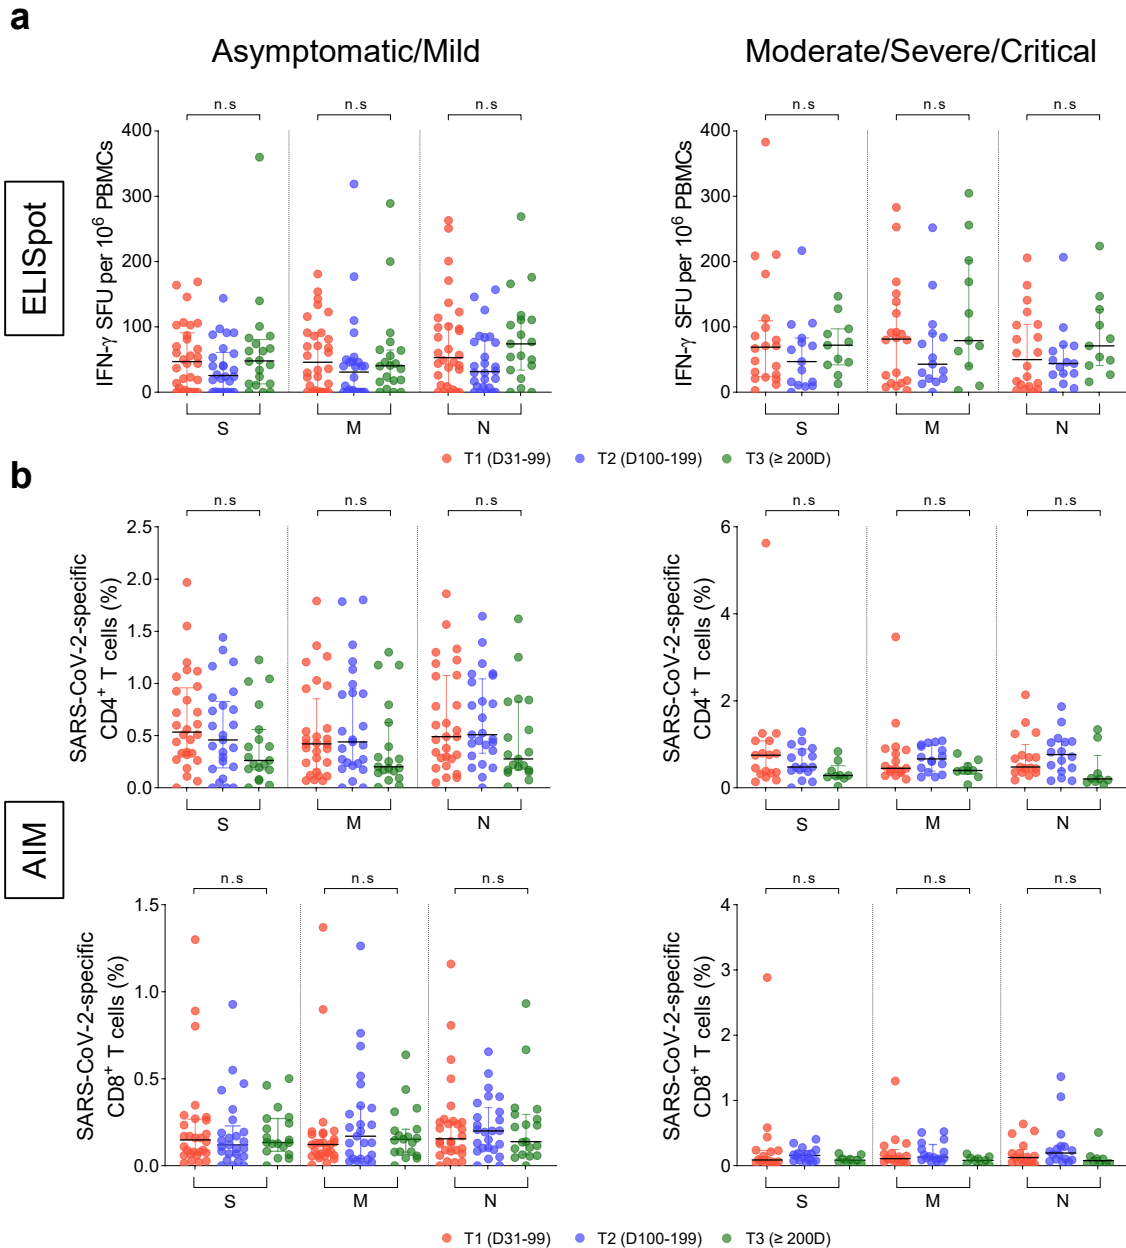

**Supplementary Figure 9. Subgroup analysis of SARS-CoV-2-specific T-cell responses according to days post-symptom onset.** Within the asymptomatic/mild group or moderate/severe/critical group, the spot-forming units of IFN- $\gamma$ -secreting cells (a) or the frequencies of SARS-CoV-2-specific AIM<sup>+</sup>CD4<sup>+</sup> T cells and AIM<sup>+</sup>CD8<sup>+</sup> T cells (b) were compared among T1 (31 - 99 DPSO), T2 (100 - 199 DPSO), and T3 ( $\geq 200$  DPSO). **a**, The magnitude of IFN- $\gamma$  responses in the asymptomatic/mild group (n=30 (T1), n=26 (T2), and n=20 (T3)), and the moderate/severe/critical group (n=19 (T1), n=15 (T2), and n=11 (T3)). **b**, The frequency of SARS-CoV-2-specific AIM<sup>+</sup> CD4<sup>+</sup> (upper) and CD8<sup>+</sup> (lower) T cells in the asymptomatic/mild group (n=28 (T1), n=25 (T2), and n=19 (T3)), and the moderate/severe/critical group (n=17 (T1), n=16 (T2), and n=9 (T3)). Data are presented as median and IQR. Statistical analyses were performed using the two-sided Kruskal-Wallis test with two-sided Dunns' multiple comparisons test. n.s., not significant.

# Supplementary Figure 10

**a**

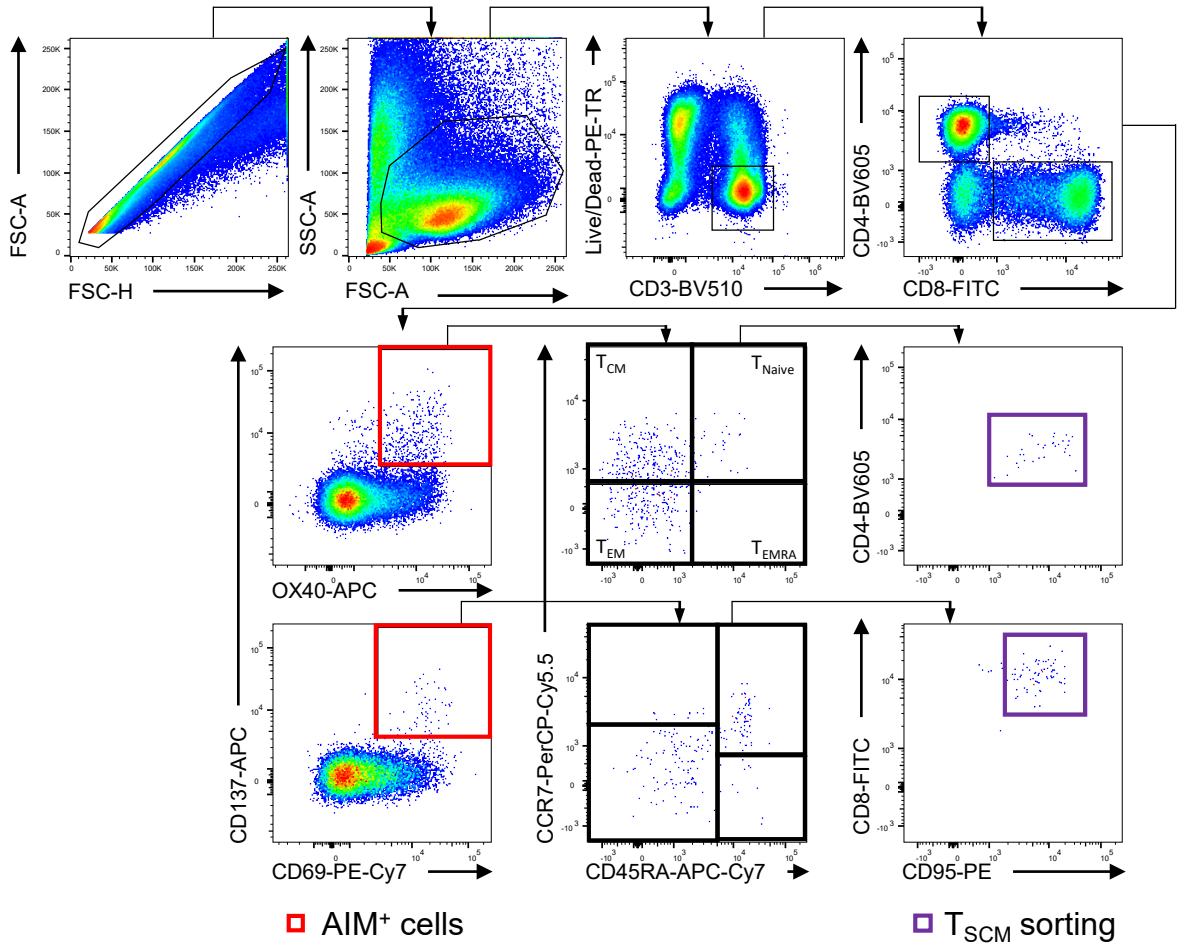

**b**

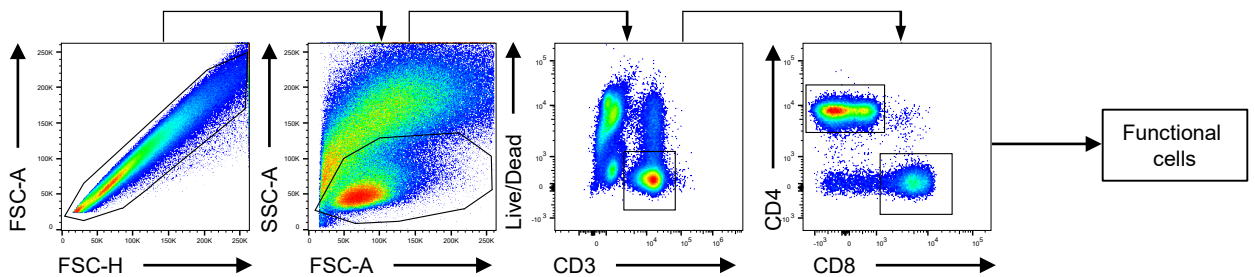

**Supplementary Figure 10. Gating strategies for cell sorting and the detection of AIM<sup>+</sup> cells and cytokine-producing cells.** **a**, Gating strategy to examine the frequencies of AIM<sup>+</sup> (CD137<sup>+</sup>OX40<sup>+</sup>) CD4<sup>+</sup> or AIM<sup>+</sup> (CD137<sup>+</sup>CD69<sup>+</sup>) CD8<sup>+</sup> T cells and to sort T<sub>SCM</sub> cells (AIM<sup>+</sup>CCR7<sup>+</sup>CD45RA<sup>+</sup>CD95<sup>+</sup>) from PBMC samples from individuals with SARS-CoV-2 infection presented on Figure 2,3 and 5e. **b**, Gating strategy to examine the frequencies of functional cells (IFN- $\gamma$ <sup>+</sup>, IL-2<sup>+</sup>, or CD107a<sup>+</sup>) from PBMC samples from individuals with SARS-CoV-2 infection presented on figure 5.

# Supplementary Table 1

**Supplementary Table 1. Characteristics of enrolled patients**

| Parameter                                 | COVID-19 (n=101)           |
|-------------------------------------------|----------------------------|
| Age (years)                               | 19-96 (median 39, IQR 30)  |
| Gender                                    |                            |
| Female (%)                                | 57 (56.4%)                 |
| Male (%)                                  | 44 (43.6%)                 |
| Ethnicity                                 |                            |
| Korean                                    | 99 (98.0%)                 |
| Non-Korean                                | 2 (2.0%)                   |
| Peak disease severity <sup>a</sup>        |                            |
| Asymptomatic, n                           | 7 (6.9%)                   |
| Mild, n                                   | 46 (45.5%)                 |
| Moderate, n                               | 25 (24.8%)                 |
| Severe, n                                 | 14 (13.9%)                 |
| Critical, n                               | 9 (8.9%)                   |
| DPSO at sample collection                 | 1-317 (median 94, IQR 117) |
| Blood collection                          |                            |
| Multiple time points, n                   | 56                         |
| 2                                         | 29                         |
| 3                                         | 18                         |
| 4                                         | 9                          |
| Single time point, n                      | 45                         |
| Assays                                    | Total 193 samples          |
| IFN- $\gamma$ ELISpot assays              | 153 samples (n=87)         |
| ICS                                       | 90 samples (n=52)          |
| AIM assays                                | 146 samples (n=80)         |
| MHC-I multimer staining                   | 15 samples (n=11)          |
| Proliferation assays                      | 18 samples (n=18)          |
| ELISA                                     | 91 samples (n=66)          |
| T <sub>SCM</sub> polyfunctionality assays | 8 samples (n=8)            |
| T <sub>SCM</sub> proliferation assays     | 3 samples (n=3)            |

IQR, interquartile range; DPSO, days post-symptom onset; ELISpot, enzyme-linked immunospot; ICS, intracellular cytokine staining; AIM, activation-induced marker; ELISA, enzyme-linked immunosorbent assay; T<sub>SCM</sub>, stem cell-like memory T cell.

<sup>a</sup>Disease severity was defined by the NIH severity of illness categories.

# Supplementary Table 2

**Supplementary Table 2. Sample composition in each assay according to disease severity and days post-symptom onset.**

| Sample distribution | ELISpot                   |                           |                           | AIM              |                  |                  | ICS              |                  |                  |
|---------------------|---------------------------|---------------------------|---------------------------|------------------|------------------|------------------|------------------|------------------|------------------|
|                     | T1 <sup>a</sup><br>(n=49) | T2 <sup>b</sup><br>(n=41) | T3 <sup>c</sup><br>(n=31) | T1<br>(n=45)     | T2<br>(n=41)     | T3<br>(n=28)     | T1<br>(n=27)     | T2<br>(n=32)     | T3<br>(n=22)     |
| <b>Asymptomatic</b> | 0/49<br>(0%)              | 3/41<br>(7.3%)            | 2/31<br>(6.5%)            | 0/45<br>(0%)     | 2/41<br>(4.9%)   | 1/28<br>(3.6%)   | 0/27<br>(0%)     | 3/32<br>(9.4%)   | 2/22<br>(9.1%)   |
| <b>Mild</b>         | 30/49<br>(61.2%)          | 23/41<br>(56.1%)          | 18/31<br>(58.1%)          | 28/45<br>(62.2%) | 23/41<br>(56.1%) | 18/28<br>(64.3%) | 17/27<br>(63.0%) | 21/32<br>(65.6%) | 12/22<br>(54.5%) |
| <b>Moderate</b>     | 11/49<br>(22.4%)          | 8/41<br>(19.5%)           | 6/31<br>(19.4%)           | 9/45<br>(20.0%)  | 9/41<br>(22.0%)  | 5/28<br>(17.9%)  | 7/27<br>(25.9%)  | 5/32<br>(15.6%)  | 5/22<br>(22.7%)  |
| <b>Severe</b>       | 5/49<br>(10.2%)           | 4/41<br>(9.5%)            | 4/31<br>(12.9%)           | 5/45<br>(11.1%)  | 4/41<br>(9.5%)   | 3/28<br>(10.7%)  | 3/27<br>(11.1%)  | 2/32<br>(6.3%)   | 2/22<br>(9.1%)   |
| <b>Critical</b>     | 3/49<br>(6.1%)            | 3/41<br>(7.3%)            | 1/31<br>(3.2%)            | 3/45<br>(6.7%)   | 3/41<br>(7.3%)   | 1/28<br>(3.6%)   | 0/27<br>(0%)     | 1/32<br>(3.1%)   | 1/22<br>(4.5%)   |

ELISpot, enzyme-linked immunospot; AIM, Activation-induced marker; ICS, Intracellular cytokine staining.

<sup>a</sup>T1, 31 - 99 DPSO; <sup>b</sup>T2, 100 - 199 DPSO; <sup>c</sup>T3, ≥ 200 DPSO.

# Supplementary Table 3

**Supplementary Table 3. Flow cytometry reagents**

| REAGENT                                                          | SOURCE         | IDENTIFIER  | Dilution |
|------------------------------------------------------------------|----------------|-------------|----------|
| FITC Anti-human CD107a (clone H4A3)                              | BD Biosciences | #555800     | 1:100    |
| APC Anti-human CD137 (clone 4B4-1)                               | BD Biosciences | #550890     | 1:100    |
| BV421 Anti-human CD137 (clone 4B4-1)                             | BD Biosciences | #564091     | 1:100    |
| PE-CF594 Anti-human CD14 (clone MφP9)                            | BD Biosciences | #562335     | 1:100    |
| APC Anti-human CD154 (clone TRAP1)                               | BD Biosciences | #555702     | 1:100    |
| PE-CF594 Anti-human CD19 (clone HIB19)                           | BD Biosciences | #562294     | 1:100    |
| BV510 Anti-human CD27 (clone L128)                               | BD Biosciences | #563092     | 1:100    |
| BV510 Anti-human CD3 (clone UCHT1)                               | BD Biosciences | #563109     | 1:100    |
| BV786 Anti-human CD3 (clone UCHT1)                               | BD Biosciences | #565491     | 1:100    |
| BV605 Anti-human CD4 (clone RPA-T4)                              | BD Biosciences | #562658     | 1:100    |
| FITC Anti-human CD4 (clone RPA-T4)                               | BD Biosciences | #555346     | 1:100    |
| PerCP™Cy5.5 Anti-human CD4 (clone RPA-T4)                        | BD Biosciences | #560650     | 1:100    |
| AF700 Anti-human TNF (clone Mab11)                               | BD Biosciences | #557996     | 1:100    |
| BB515 Anti-human CD45RO (clone UCHL1)                            | BD Biosciences | #564529     | 1:100    |
| PE-Cy7 Anti-human CD69 (clone FN50)                              | BD Biosciences | #557745     | 1:100    |
| APC-Cy7 Anti-human CD8 (clone SK1)                               | BD Biosciences | #560179     | 1:100    |
| BV605 Anti-human CD8 (clone SK1)                                 | BD Biosciences | #564116     | 1:100    |
| BV711 Anti-human CD8 (clone RPA-T8)                              | BD Biosciences | #563677     | 1:100    |
| PE Anti-human CD95 (clone DX2)                                   | BD Biosciences | #555674     | 1:100    |
| PE-Cy7 Anti-human IFN-γ (clone 4S.B3)                            | BD Biosciences | #557844     | 1:100    |
| APC Anti-human IL-2 (clone MQ1-17H12)                            | BD Biosciences | #554567     | 1:100    |
| BV786 Anti-human Ki-67 (clone B56)                               | BD Biosciences | #563756     | 1:100    |
| PerCP™Cy5.5 Anti-human CCR7 (clone G043H7)                       | BioLegend      | #353220     | 1:100    |
| PE Anti-human CD137 (clone 4B4-1)                                | BioLegend      | #309804     | 1:100    |
| APC Anti-human CD3 (clone HIT3a)                                 | BioLegend      | #300312     | 1:100    |
| APC-Cy7 Anti-human CD45RA (clone HI100)                          | BioLegend      | #304128     | 1:100    |
| FITC Anti-human CD8 (clone RPA-T8)                               | BioLegend      | #301050     | 1:100    |
| BV421 Anti-human OX40 (clone Ber-ACT35)                          | BioLegend      | #350014     | 1:100    |
| BV421 Anti-human PD-1 (clone EH12.2H7)                           | BioLegend      | #329920     | 1:100    |
| PE-Cy7 Anti-human TIGIT (clone MBSA43)                           | Invitrogen     | #25-9500-42 | 1:100    |
| APC YLQPRFTLL (SARS-CoV-2 S <sub>269</sub> ) HLA-A*0201 Pentamer | Proimmune      | #4339       | 1:20     |
| APC GILGFVFTL (IAV MP <sub>58</sub> ) HLA-A*0201 Dextramer       | Immudex        | #WB2161     | 1:20     |
| APC NLVPMVATV (CMV pp65 <sub>495</sub> ) HLA-A*0201 Dextramer    | Immudex        | #WB2132     | 1:20     |
